# Supplementary material
Source: Elsevier journal article supplement (https://www.sciencedirect.com/science/article/pii/S1885585725000490)
Supplement: mmc1 [file mmc1.pdf]

## **SUPPLEMENTARY DATA**

### **Table of contents**

1. **Supplementary tables**
2. **Supplementary figures**

## 1. Supplementary Tables

**Supplementary table 1.** Standardized mean differences of variables before and after inverse-probability-weighting adjustment

|                                               | Unadjusted | Adjusted |
|-----------------------------------------------|------------|----------|
| Male sex                                      | 5.2        | 5.1      |
| Age, y                                        | 34.7       | 1.5      |
| Left ventricular ejection fraction            | 24.6       | 2.1      |
| Acute coronary syndrome                       | 21.5       | 7.7      |
| Current smoking                               | 11.3       | 1.8      |
| Hypertension                                  | 10.3       | 0.7      |
| Diabetes mellitus                             | 2.5        | 1.7      |
| Dyslipidemia                                  | 16.3       | 0.5      |
| Chronic kidney disease                        | 9.8        | 5.2      |
| History of percutaneous coronary intervention | 27.5       | 3.9      |
| History of myocardial infarction              | 24.0       | 1.0      |
| History of stroke                             | 9.4        | 1.5      |
| History of peripheral artery disease          | 10.4       | 8.0      |
| Family history of coronary artery disease     | 17.1       | 0.6      |
| LM disease                                    | 7.4        | 11.8     |

|                                   |       |      |
|-----------------------------------|-------|------|
| LAD disease                       | 11.4  | 9.1  |
| LCX disease                       | 15.8  | 2.2  |
| RCA disease                       | 26.5  | 3.0  |
| Multivessel disease               | 17.9  | 0.1  |
| In-stent restenosis               | 16.2  | 9.0  |
| Blunt stump                       | 12.4  | 2.4  |
| Bridging collateral               | 10.8  | 1.5  |
| Collateral vessel grade 3         | 3.4   | 3.9  |
| Calcification                     | 3.3   | 4.6  |
| Aspirin                           | 21.6  | 2.8  |
| Clopidogrel                       | 103.5 | 3.1  |
| Other antiplatelet                | 10.5  | 6.7  |
| Statin                            | 15.7  | 13.2 |
| Beta-blocker                      | 2.3   | 2.4  |
| Calcium channel blocker           | 16.7  | 7.2  |
| Renin-angiotensin system blockade | 2.1   | 10.4 |
| Spirolactone                      | 11.3  | 1.3  |

---

LM, left main coronary artery; LAD, left anterior descending artery; LCX, left circumflex artery; RCA, right coronary artery

## 2. Supplementary Figures

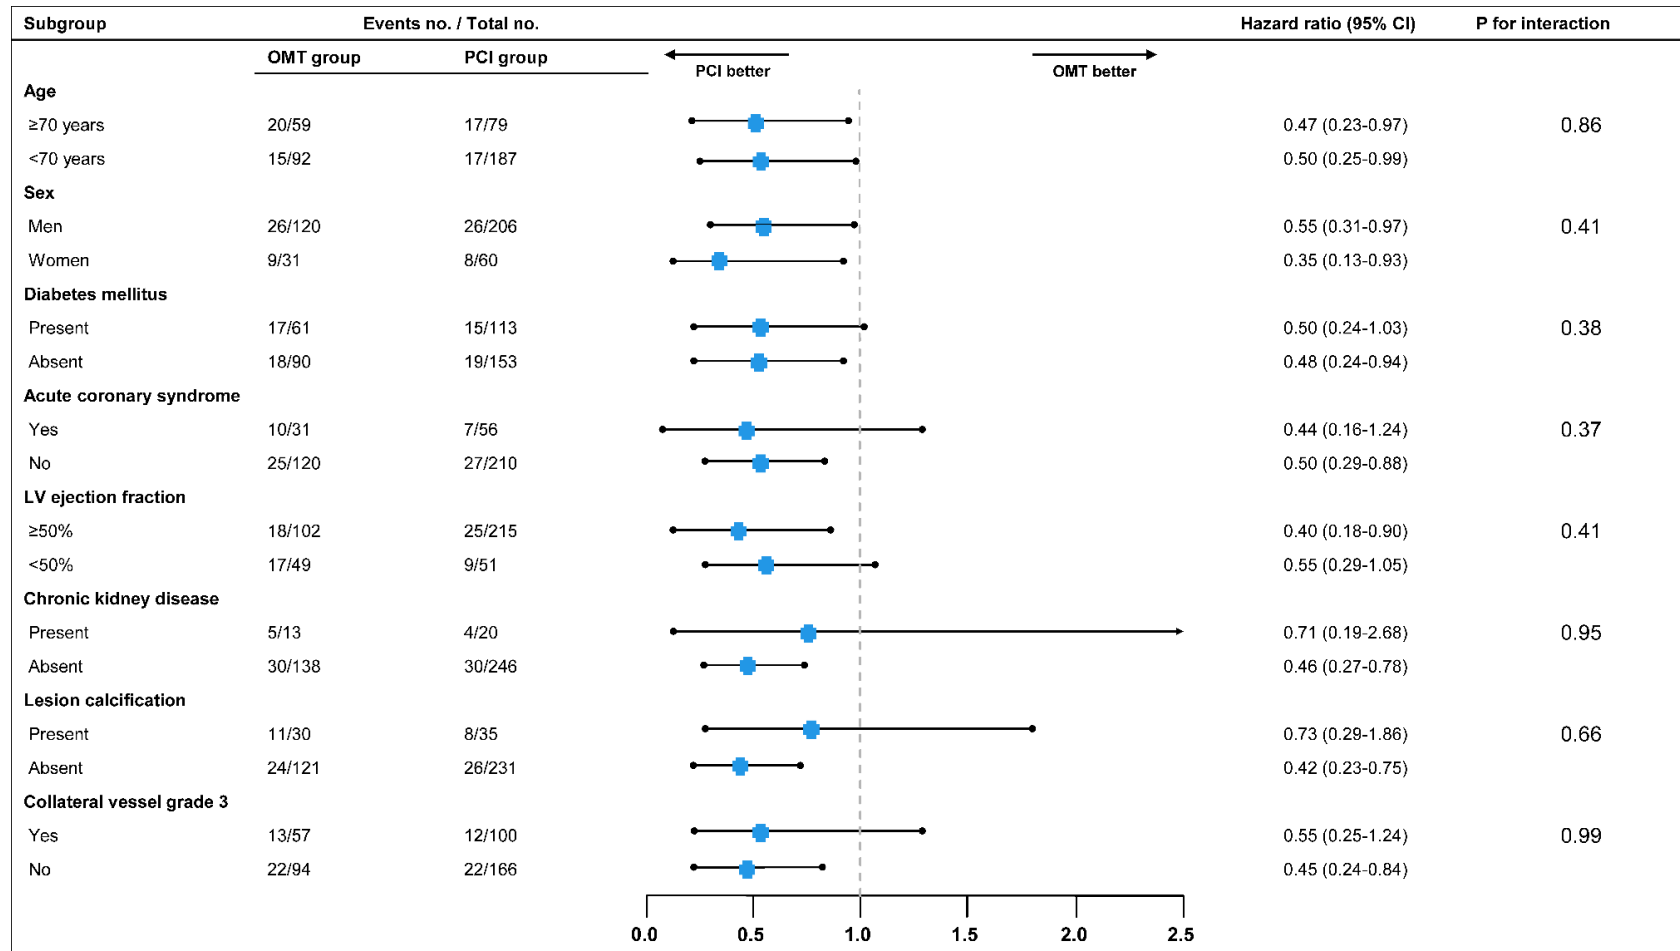

**Supplementary Figure 1.** Subgroup analysis for primary outcome in LAD CTO population. Benefits of PCI for LAD CTO were generally observed throughout various subgroups of clinical factors. No significant interactions between the factors and the treatment methods were found in any of the pairs.

CI, confidence interval; LV, left ventricular; OMT, optimal medical therapy; PCI, percutaneous coronary intervention.

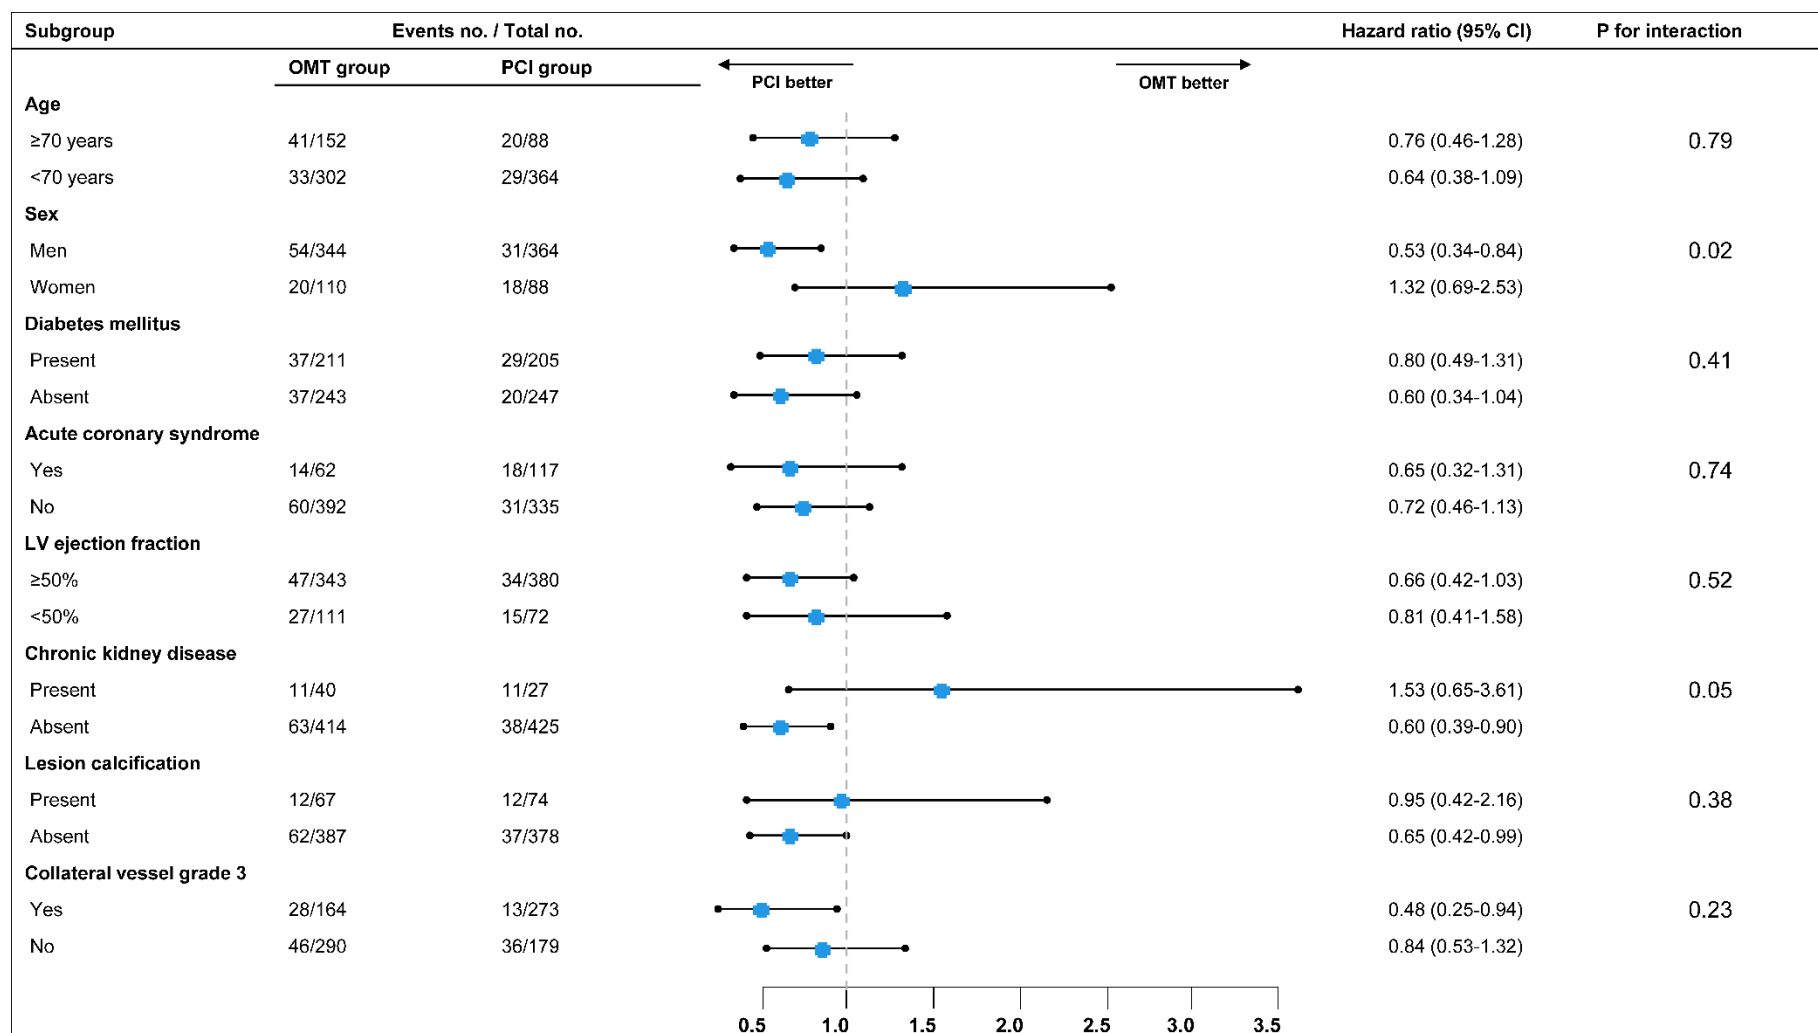

**Supplementary Figure 2.** Subgroup analysis for primary outcome in non-LAD CTO population. Men and those without chronic kidney disease showed significant benefit from PCI for non-LAD CTO. Significant interaction between sexes and the treatment methods were observed.

Abbreviations. CI, confidence interval; LV, left ventricular; OMT, optimal medical therapy; PCI, percutaneous coronary intervention.
